# Supplementary material for: Occurrence of Lymphangiogenesis in Peripheral Nerve Autografts Contrasts Schwann Cell-induced Apoptosis of Lymphatic Endothelial Cells <em>in vitro</em>
Source: Preprints.org preprint supplement (doi:10.20944/preprints202205.0305.v1), 2022-05-23
Supplement: Supplementary file 1 [file supplementary]

## Supplementary Figures

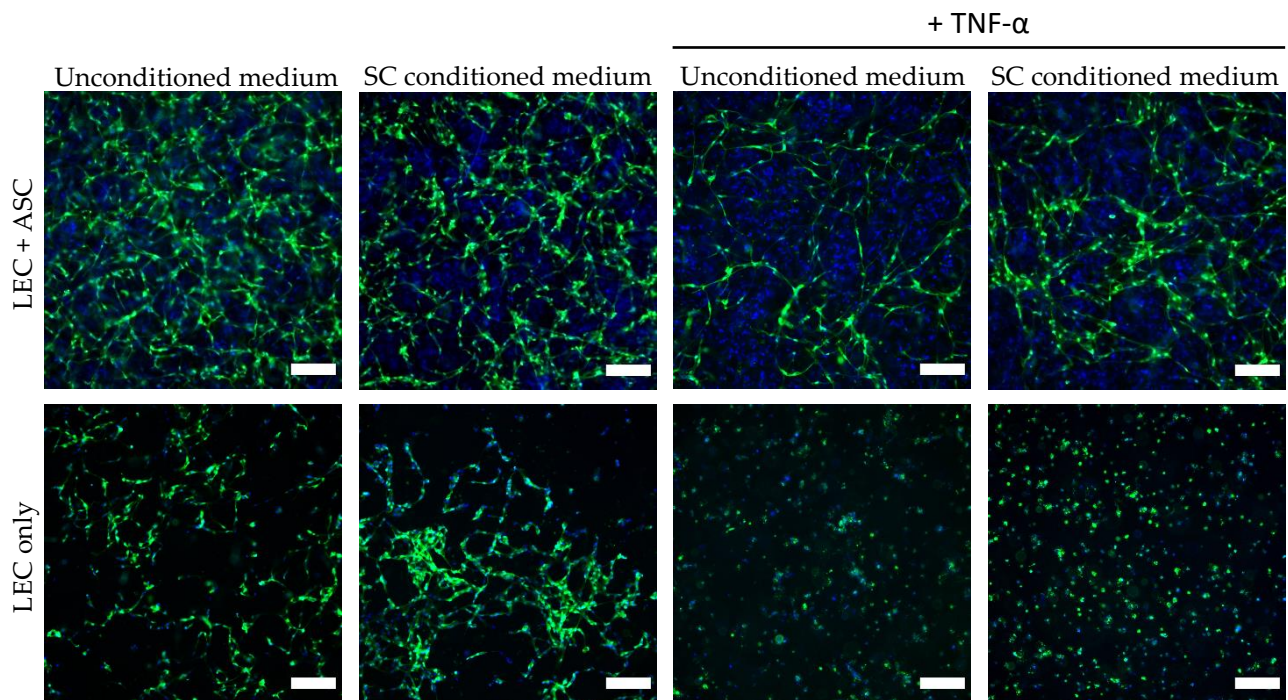

**Supplementary Figure 1: Lymphatic network formation is hindered when cultivated in Schwann cell-conditioned medium.** LECs and ASCs or LECs only were cultivated in fibrin hydrogels for 7 days containing either unconditioned medium or Schwann-cell conditioned medium. LECs failed to form tube-like structures when cultivated in SC-conditioned medium and furthermore clustered together. In contrast, this effect was less pronounced when LECs were cultivated with ASCs. Green – LECs. Scale bars = 200  $\mu$ m.

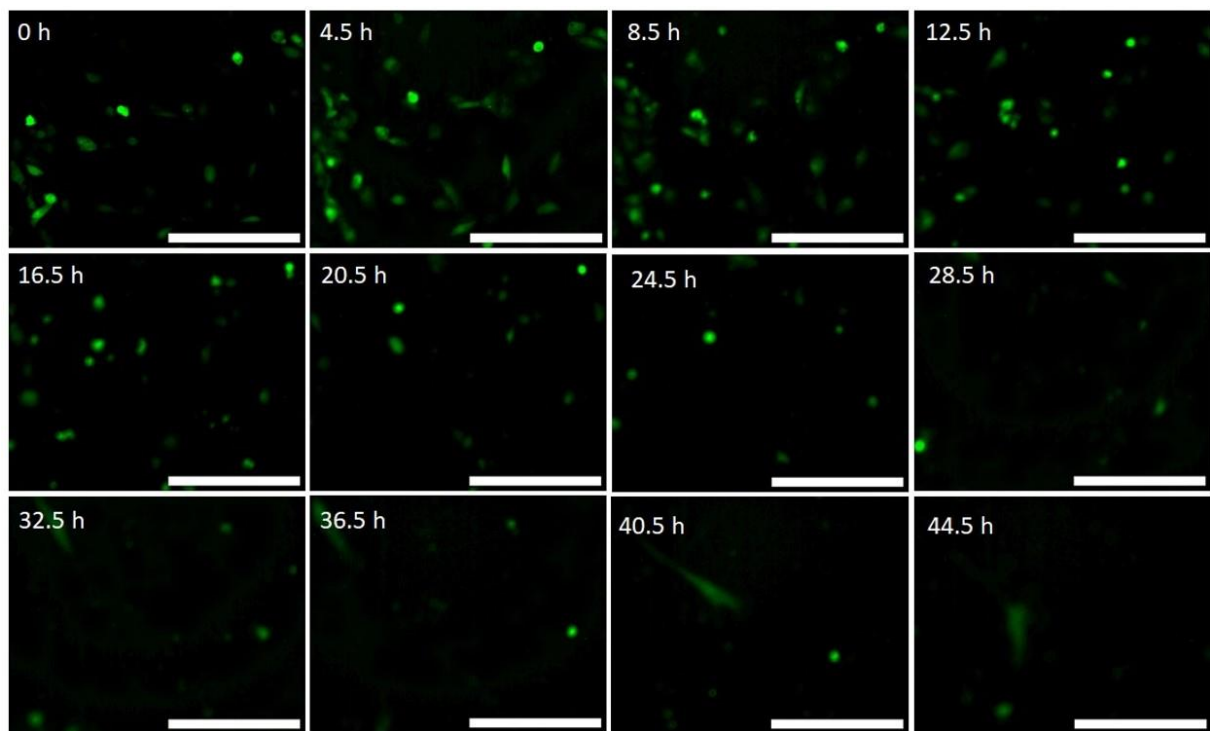

**Supplementary Figure 2:** Live cell imaging of YFP-LEC and SC co-culture with the JuLI Smart fluorescent analyzer offers visual confirmation of the diminishing number of YFP-LECs present in the selected field of view, over 48 hours. Exhibited in this figure are selected images collected during the 48 hour time period showcasing YFP-LECs exhibiting green fluorescence. SCs are not fluorescently labeled and are therefore not visualized here. Scale bars = 100  $\mu$ m.

## Supplementary Tables:

**Supplementary Table 1: Detailed statistics report of Angiotool network quantification.**

|                                          | Tubule length rel. pos. ctrl |                    |                  |         |                  | No of Junctions rel. pos. ctrl |                    |                  |         |                  | Vessels percentage area |                    |                  |         |                  |    |    |
|------------------------------------------|------------------------------|--------------------|------------------|---------|------------------|--------------------------------|--------------------|------------------|---------|------------------|-------------------------|--------------------|------------------|---------|------------------|----|----|
| Tukey's multiple comparisons test        | Mean Diff,                   | 95,00% CI of diff, | Below threshold? | Summary | Adjusted P Value | Mean Diff,                     | 95,00% CI of diff, | Below threshold? | Summary | Adjusted P Value | Mean Diff,              | 95,00% CI of diff, | Below threshold? | Summary | Adjusted P Value | n1 | n2 |
| LEC + SC + ASC vs. LEC + SC + ASC + TNF  | 49.81                        | 32,70 to 66,92     | Yes              | ****    | <0,0001          | 42.54                          | 18,84 to 66,24     | Yes              | ****    | <0,0001          | 21.19                   | 15,72 to 26,66     | Yes              | ****    | <0,0001          | 24 | 23 |
| LEC + SC + ASC vs. LEC + SC              | 73.57                        | 49,64 to 97,51     | Yes              | ****    | <0,0001          | 64.2                           | 31,05 to 97,36     | Yes              | ****    | <0,0001          | 28.16                   | 20,51 to 35,81     | Yes              | ****    | <0,0001          | 24 | 8  |
| LEC + SC + ASC vs. LEC + SC + TNF        | 67.22                        | 44,30 to 90,14     | Yes              | ****    | <0,0001          | 60.55                          | 28,80 to 92,29     | Yes              | ****    | <0,0001          | 26.54                   | 19,22 to 33,87     | Yes              | ****    | <0,0001          | 24 | 9  |
| LEC + SC + ASC vs. LEC + ASC             | -20.68                       | -37,13 to -4,230   | Yes              | **      | 0.0041           | -34.47                         | -57,25 to -11,69   | Yes              | ***     | 0.0002           | -9.524                  | -14,78 to -4,268   | Yes              | ****    | <0,0001          | 24 | 27 |
| LEC + SC + ASC vs. LEC + ASC + TNF       | -4.885                       | -21,33 to 11,56    | No               | ns      | 0.984            | -16.39                         | -39,17 to 6,392    | No               | ns      | 0.3482           | -1.525                  | -6,934 to 3,883    | No               | ns      | 0.9882           | 24 | 27 |
| LEC + SC + ASC vs. LEC only              | 18.61                        | -4,310 to 41,52    | No               | ns      | 0.2038           | 14.84                          | -16,91 to 46,58    | No               | ns      | 0.8362           | 6.573                   | -0,7503 to 13,90   | No               | ns      | 0.1129           | 24 | 9  |
| LEC + SC + ASC vs. LEC only + TNF        | 72.61                        | 43,79 to 101,4     | Yes              | ****    | <0,0001          | 61.22                          | 21,29 to 101,1     | Yes              | ***     | 0.0002           | 27.56                   | 18,35 to 36,77     | Yes              | ****    | <0,0001          | 24 | 5  |
| LEC + SC + ASC + TNF vs. LEC + SC        | 23.76                        | -0,3009 to 47,83   | No               | ns      | 0.0556           | 21.66                          | -11,67 to 55,00    | No               | ns      | 0.4835           | 6.966                   | -0,7246 to 14,66   | No               | ns      | 0.1062           | 23 | 8  |
| LEC + SC + ASC + TNF vs. LEC + SC + TNF  | 17.41                        | -5,642 to 40,46    | No               | ns      | 0.2867           | 18.01                          | -13,92 to 49,94    | No               | ns      | 0.662            | 5.353                   | -2,013 to 12,72    | No               | ns      | 0.3349           | 23 | 9  |
| LEC + SC + ASC + TNF vs. LEC + ASC       | -70.49                       | -87,12 to -53,85   | Yes              | ****    | <0,0001          | -77.01                         | -100,1 to -53,97   | Yes              | ****    | <0,0001          | -30.72                  | -36,03 to -25,40   | Yes              | ****    | <0,0001          | 23 | 27 |
| LEC + SC + ASC + TNF vs. LEC + ASC + TNF | -54.69                       | -71,33 to -38,06   | Yes              | ****    | <0,0001          | -58.93                         | -81,98 to -35,89   | Yes              | ****    | <0,0001          | -22.72                  | -28,18 to -17,25   | Yes              | ****    | <0,0001          | 23 | 27 |
| LEC + SC + ASC + TNF vs. LEC only        | -31.2                        | -54,26 to -8,151   | Yes              | **      | 0.0014           | -27.7                          | -59,63 to 4,227    | No               | ns      | 0.1402           | -14.62                  | -21,98 to -7,251   | Yes              | ****    | <0,0001          | 23 | 9  |
| LEC + SC + ASC + TNF vs. LEC only + TNF  | 22.8                         | -6,129 to 51,73    | No               | ns      | 0.2363           | 18.68                          | -21,40 to 58,75    | No               | ns      | 0.8382           | 6.369                   | -2,876 to 15,61    | No               | ns      | 0.405            | 23 | 5  |
| LEC + SC vs. LEC + SC + TNF              | -6.354                       | -34,84 to 22,14    | No               | ns      | 0.9972           | -3.659                         | -43,12 to 35,80    | No               | ns      | >0,9999          | -1.613                  | -10,72 to 7,491    | No               | ns      | 0.9994           | 8  | 9  |
| LEC + SC vs. LEC + ASC                   | -94.25                       | -117,9 to -70,65   | Yes              | ****    | <0,0001          | -98.68                         | -131,4 to -65,99   | Yes              | ****    | <0,0001          | -37.68                  | -45,22 to -30,14   | Yes              | ****    | <0,0001          | 8  | 27 |
| LEC + SC vs. LEC + ASC + TNF             | -78.46                       | -102,1 to -54,86   | Yes              | ****    | <0,0001          | -80.6                          | -113,3 to -47,91   | Yes              | ****    | <0,0001          | -29.68                  | -37,33 to -22,03   | Yes              | ****    | <0,0001          | 8  | 27 |
| LEC + SC vs. LEC only                    | -54.97                       | -83,46 to -26,48   | Yes              | ****    | <0,0001          | -49.37                         | -88,83 to -9,906   | Yes              | **      | 0.0044           | -21.58                  | -30,69 to -12,48   | Yes              | ****    | <0,0001          | 8  | 9  |
| LEC + SC vs. LEC only + TNF              | -0.9631                      | -34,39 to 32,46    | No               | ns      | >0,9999          | -2.988                         | -49,29 to 43,31    | No               | ns      | >0,9999          | -0.5965                 | -11,28 to 10,08    | No               | ns      | >0,9999          | 8  | 5  |
| LEC + SC + TNF vs. LEC + ASC             | -87.9                        | -110,5 to -65,33   | Yes              | ****    | <0,0001          | -95.02                         | -126,3 to -63,76   | Yes              | ****    | <0,0001          | -36.07                  | -43,28 to -28,86   | Yes              | ****    | <0,0001          | 9  | 27 |
| LEC + SC + TNF vs. LEC + ASC + TNF       | -72.11                       | -94,67 to -49,54   | Yes              | ****    | <0,0001          | -76.94                         | -108,2 to -45,68   | Yes              | ****    | <0,0001          | -28.07                  | -35,39 to -20,75   | Yes              | ****    | <0,0001          | 9  | 27 |
| LEC + SC + TNF vs. LEC only              | -48.61                       | -76,25 to -20,97   | Yes              | ****    | <0,0001          | -45.71                         | -83,99 to -7,426   | Yes              | **      | 0.008            | -19.97                  | -28,80 to -11,14   | Yes              | ****    | <0,0001          | 9  | 9  |
| LEC + SC + TNF vs. LEC only + TNF        | 5.391                        | -27,31 to 38,09    | No               | ns      | 0.9996           | 0.6706                         | -44,63 to 45,97    | No               | ns      | >0,9999          | 1.016                   | -9,434 to 11,47    | No               | ns      | >0,9999          | 9  | 5  |
| LEC + ASC vs. LEC + ASC + TNF            | 15.79                        | -0,1648 to 31,75   | No               | ns      | 0.0546           | 18.08                          | -4,023 to 40,18    | No               | ns      | 0.196            | 7.999                   | 2,742 to 13,26     | Yes              | ***     | 0.0002           | 27 | 27 |
| LEC + ASC vs. LEC only                   | 39.28                        | 16,72 to 61,85     | Yes              | ****    | <0,0001          | 49.31                          | 18,05 to 80,57     | Yes              | ****    | <0,0001          | 16.1                    | 8,886 to 23,31     | Yes              | ****    | <0,0001          | 27 | 9  |
| LEC + ASC vs. LEC only + TNF             | 93.29                        | 64,74 to 121,8     | Yes              | ****    | <0,0001          | 95.69                          | 56,15 to 135,2     | Yes              | ****    | <0,0001          | 37.08                   | 27,96 to 46,21     | Yes              | ****    | <0,0001          | 27 | 5  |
| LEC + ASC + TNF vs. LEC only             | 23.49                        | 0,9250 to 46,06    | Yes              | *       | 0.035            | 31.23                          | -0,02978 to 62,49  | No               | ns      | 0.0504           | 8.099                   | 0,7752 to 15,42    | Yes              | *       | 0.0193           | 27 | 9  |
| LEC + ASC + TNF vs. LEC only + TNF       | 77.5                         | 48,95 to 106,0     | Yes              | ****    | <0,0001          | 77.61                          | 38,07 to 117,1     | Yes              | ****    | <0,0001          | 29.09                   | 19,88 to 38,30     | Yes              | ****    | <0,0001          | 27 | 5  |
| LEC only vs. LEC only + TNF              | 54                           | 21,30 to 86,71     | Yes              | ****    | <0,0001          | 46.38                          | 1,082 to 91,68     | Yes              | *       | 0.0407           | 20.99                   | 10,54 to 31,44     | Yes              | ****    | <0,0001          | 9  | 5  |
